# Supplementary material
Source: PubMed Central journal article supplement (PMC4867154)
Supplement: supp_kwv302_kwv302supp.pdf [file supp_kwv302_kwv302supp.pdf]

## WEB APPENDIX

### ***Nonvertebral fracture outcome definition***

Unless otherwise noted, fracture date is the date of diagnosis or procedure — whichever comes first.

Note: fracture definitions were derived primarily from Ray et al. (1).

a. **Hip**

- diagnosis during hospitalization (ICD-9-CMv1: 820.xx, 733.14) – PLUS –
- procedure during same hospitalization (ICD-9-CMv3: 78.55, 79.05, 79.15, 79.25, 79.35, 79.65, CPT-4: 27230-27248)

b. **Distal forearm --**

- Diagnosis (ICD-9: 813.4x, 813.5x, 733.12) – PLUS –
- Procedure within +/-30 days of fracture date (ICD-9-CMv3: 78.53, 79.02, 79.12, 79.22, 79.32, 79.62; CPT-4: 24650, 24655, 24660, 24665, 24666, 25600, 25605, 25610, 25611, 25615, 25620, 25650)

----- OR -----

- Diagnosis (ICD-9: 813.8x, 813.9x) – PLUS –
- Procedure within +/- 30 days of fracture date (CPT-4: 24650, 24655, 24660, 24665, 24666, 25600, 25605, 25610, 25611, 25615, 25620, 25650)

c. **Proximal forearm**

- Diagnosis (ICD-9-CMv1: 813.0x – 813.3x, 813.8x, 813.9x) – PLUS –
- Procedure within +/-30 days of fracture date (ICD-9-CMv3: 78.53, 79.02, 79.12, 79.22, 79.32, 79.62; CPT-4: 24620, 24625, 24635, 24680, 24685, 25500, 25505, 25510, 25515, 25530, 25535, 25540, 25545, 25560, 25565, 25570, 25575)

d. **Humerus**

- Diagnosis (ICD-9-CMv1: 812.xx, 733.11) – PLUS –
- Procedure within +/-30 days of fracture date (ICD-9-CMv3: 78.52, 79.01, 79.11, 79.21, 79.31, 79.61, CPT-4: 23600, 23605, 23610, 23615, 23620, 23625, 23630, 23665, 23670, 23675, 23680, 24500, 24505, 24506, 24510, 24515, 24530, 24531, 24535, 24536, 24538, 24540, 24542, 24545, 24560, 24565, 24570, 24575-24581, 24583, 24585-24588, 24516)

e. **Pelvis**

- Diagnosis (ICD-9: 808.xx) – PLUS –
- Procedure within +/- 30 days of fracture date (CPT-4: 27190 – 27192, 27200 – 27228)

### ***Composite cardiovascular outcome definition***

a) Myocardial infarction:

**Algorithm:** Hospitalization episode lasting at least 3 days and no more than 180 days with one of the following ICD-9-CM diagnosis codes: 410.01, 410.11, 410.21, 410.31, 410.41, 410.51, 410.61, 410.71, 410.81, or 410.91. These diagnosis codes must have been listed on the discharge abstract as the principal reason for admission (principal diagnosis) or the next diagnosis (secondary diagnosis). Re-admissions for AMI (410 with a fifth digit of 2 indicating the prior hospitalization due to AMI within 8 weeks) were excluded, to identify only initial hospitalizations. The length of stay could have been less than three days if the subject died during the hospitalization.

b) Cerebrovascular events:

ICD-9 diagnostic codes:

|                        |                                                |
|------------------------|------------------------------------------------|
| 430.x                  | Subarachnoid hemorrhage                        |
| 431.x                  | Intracerebral hemorrhage                       |
| 433.x1                 | Occlusion and stenosis of precerebral arteries |
| 434.x (exclude 434.x0) | Occlusion of cerebral arteries                 |
| 436.x                  | Acute but ill-defined cerebrovascular disease  |

**Algorithm:** These diagnosis codes can be in any position on the inpatient discharge

c) Acute coronary syndrome (with or without revascularization):

Any ICD-9 diagnosis code of 410.xx – 414.xx (where X can be any or no 4th / 5th digit)

d) Acute coronary syndrome with revascularization:

Any ICD-9 diagnosis code for ACS of 410.xx – 414.xx (where X can be any or no 4th / 5th digit)

-- AND --

ICD-9 and CPT-4 procedure codes for revascularization including: PTCA, any coronary stenting, CABG surgery

PTCA:

CPT-4: 92982, 92995, 92997, 92982-92984

-- OR --

ICD-9 proc: 00.66, 36.03, 36.09

-- OR --

DRG: 112, 555

Stenting:

CPT-4 92980, 92981

-- OR --

ICD-9 procedure: 36.06, 36.07

-- OR --

DRG: 556, 557,558

CABG:

CPT-4: 33510 – 33545

--OR --

ICD-9 procedure: 36.1x, 36.2x

-- OR --

DRG: 106, 107, 109, 547, 548, 549, 550

*Summary score distributions for raloxifene and nonvertebral fracture example*

**Web Figure 1. Propensity score distributions**

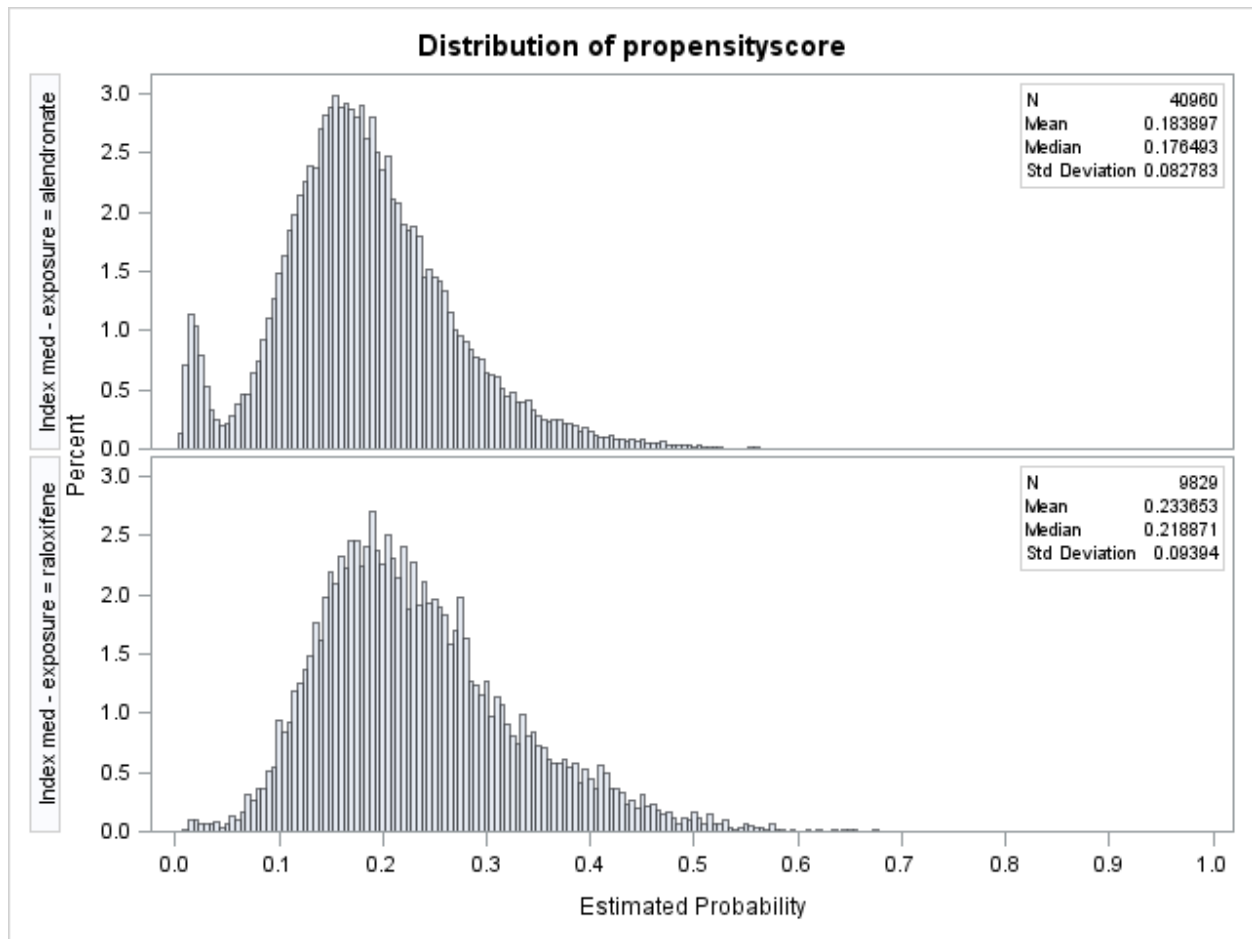

Web Figure 2. Disease risk score distributions

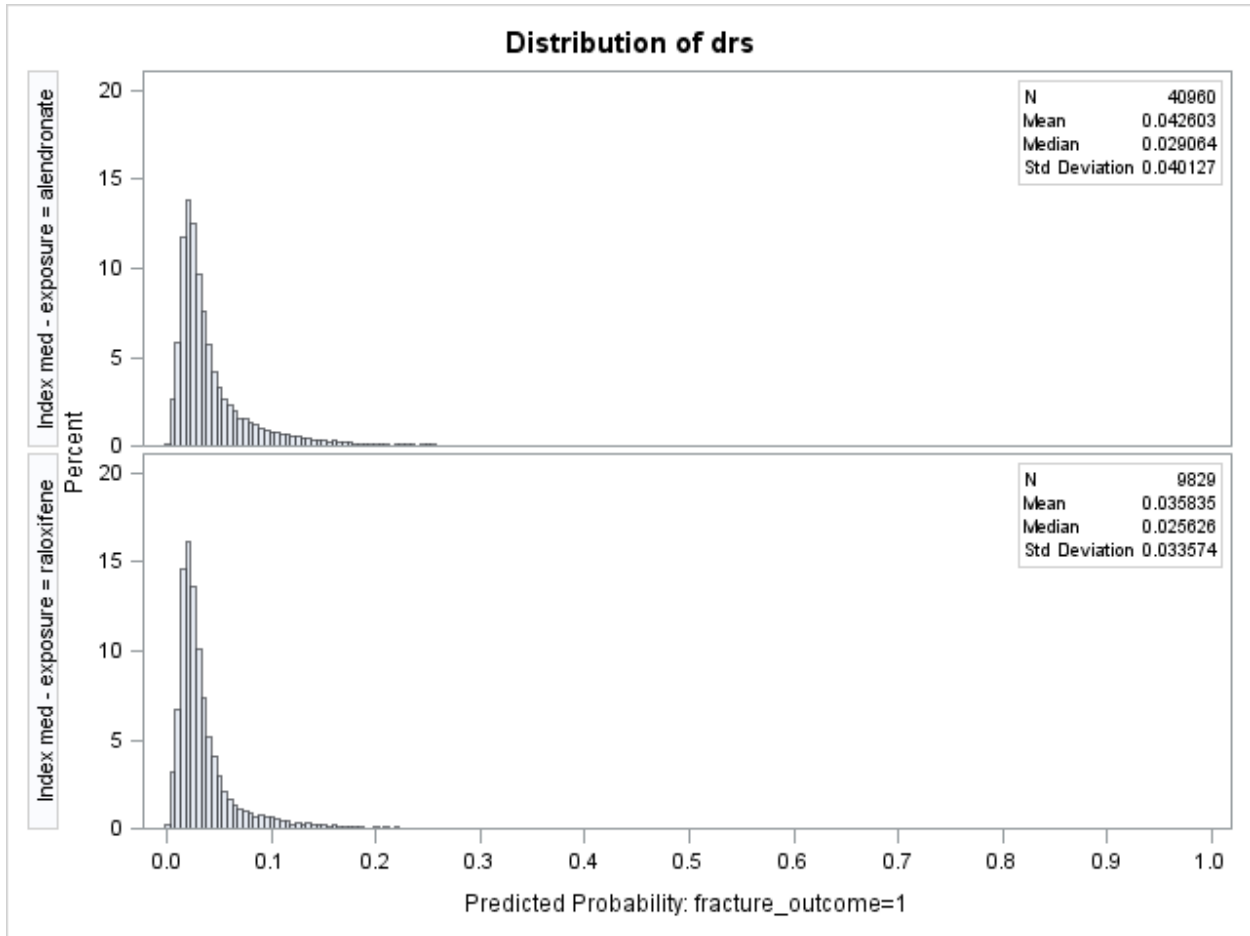

Web Figure 3. Prognostic propensity score distributions

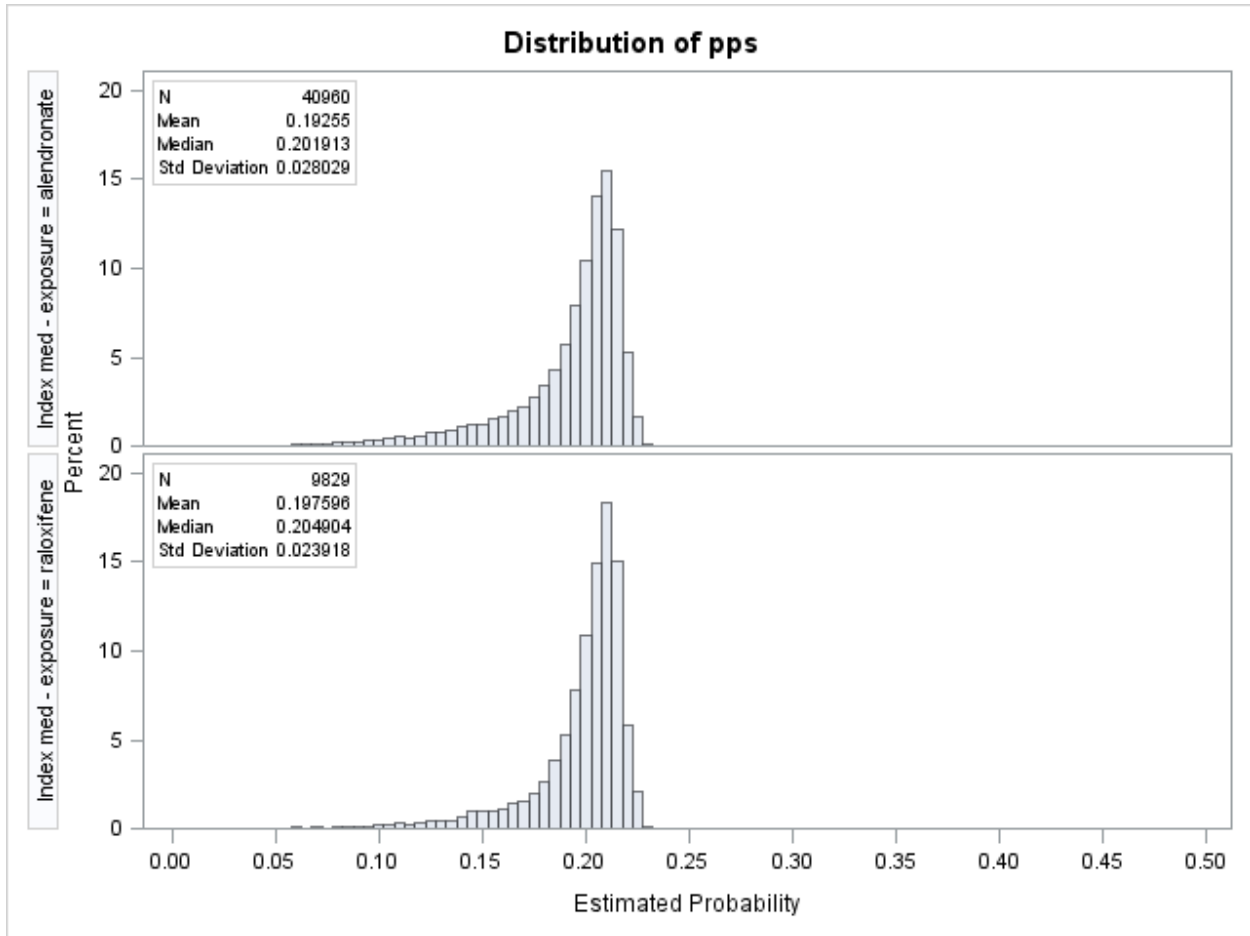

**Web Table 1. 1:1 Matching Results in Raloxifene vs. Alendronate and Nonvertebral Fracture Example**

| Caliper Width                  | Odds Ratio for Fracture Raloxifene vs. Alendronate <sup>a</sup> |            | # Patients Matched | # Raloxifene Matched | % Raloxifene Matched | # Alendronate Matched | % Alendronate Matched | # Events | % Events | # Events Raloxifene | # Events Alendronate |
|--------------------------------|-----------------------------------------------------------------|------------|--------------------|----------------------|----------------------|-----------------------|-----------------------|----------|----------|---------------------|----------------------|
|                                | OR                                                              | 95% CI     |                    |                      |                      |                       |                       |          |          |                     |                      |
| <b>PS</b>                      |                                                                 |            |                    |                      |                      |                       |                       |          |          |                     |                      |
| 0.3*SD logit(PS) <sup>b</sup>  | 1.00                                                            | 0.86, 1.16 | 19,612             | 9,806                | 99.77                | 9,806                 | 23.94                 | 708      | 33.73    | 354                 | 354                  |
| 0.2*SD logit(PS)               | 1.00                                                            | 0.86, 1.16 | 19,604             | 9,802                | 99.73                | 9,802                 | 23.93                 | 708      | 33.73    | 354                 | 354                  |
| 0.1*SD logit(PS)               | 1.00                                                            | 0.86, 1.16 | 19,594             | 9,797                | 99.67                | 9,797                 | 23.92                 | 708      | 33.73    | 354                 | 354                  |
| 0.05                           | 1.00                                                            | 0.86, 1.16 | 19,612             | 9,806                | 99.77                | 9,806                 | 23.94                 | 708      | 33.73    | 354                 | 354                  |
| 0.025                          | 1.00                                                            | 0.86, 1.16 | 19,596             | 9,798                | 99.68                | 9,798                 | 23.92                 | 708      | 33.73    | 354                 | 354                  |
| 0.01                           | 1.00                                                            | 0.86, 1.16 | 19,588             | 9,794                | 99.64                | 9,794                 | 23.91                 | 708      | 33.73    | 354                 | 354                  |
| 0.001                          | 1.00                                                            | 0.86, 1.16 | 19,442             | 9,721                | 98.90                | 9,721                 | 23.73                 | 705      | 33.59    | 352                 | 353                  |
| 0.0001                         | 0.99                                                            | 0.85, 1.15 | 18,766             | 9,383                | 95.46                | 9,383                 | 22.91                 | 691      | 32.92    | 344                 | 347                  |
| <b>DRS</b>                     |                                                                 |            |                    |                      |                      |                       |                       |          |          |                     |                      |
| 0.3*SD logit(DRS) <sup>b</sup> | 0.96                                                            | 0.83, 1.11 | 19,656             | 9,828                | 99.99                | 9,828                 | 23.99                 | 722      | 34.40    | 354                 | 368                  |
| 0.2*SD logit(DRS)              | 0.96                                                            | 0.83, 1.11 | 19,654             | 9,827                | 99.98                | 9,827                 | 23.99                 | 722      | 34.40    | 354                 | 368                  |
| 0.1*SD logit(DRS)              | 0.96                                                            | 0.83, 1.11 | 19,650             | 9,825                | 99.96                | 9,825                 | 23.99                 | 722      | 34.40    | 354                 | 368                  |
| 0.05                           | 0.96                                                            | 0.83, 1.11 | 19,658             | 9,829                | 100                  | 9,829                 | 24.00                 | 722      | 34.40    | 354                 | 368                  |
| 0.025                          | 0.96                                                            | 0.83, 1.11 | 19,658             | 9,829                | 100                  | 9,829                 | 24.00                 | 722      | 34.40    | 354                 | 368                  |
| 0.01                           | 0.96                                                            | 0.83, 1.11 | 19,658             | 9,829                | 100                  | 9,829                 | 24.00                 | 722      | 34.40    | 354                 | 368                  |
| 0.001                          | 0.96                                                            | 0.83, 1.11 | 19,656             | 9,828                | 99.99                | 9,828                 | 23.99                 | 722      | 34.40    | 354                 | 368                  |
| 0.0001                         | 0.96                                                            | 0.83, 1.12 | 19,598             | 9,799                | 99.69                | 9,799                 | 23.92                 | 711      | 33.87    | 349                 | 362                  |
| <b>PPS</b>                     |                                                                 |            |                    |                      |                      |                       |                       |          |          |                     |                      |
| 0.3*SD logit(PPS) <sup>b</sup> | 0.96                                                            | 0.83, 1.11 | 19,658             | 9,829                | 100                  | 9,829                 | 24.00                 | 722      | 34.40    | 354                 | 368                  |
| 0.2*SD logit(PPS)              | 0.96                                                            | 0.83, 1.11 | 19,658             | 9,829                | 100                  | 9,829                 | 24.00                 | 722      | 34.40    | 354                 | 368                  |
| 0.1*SD logit(PPS)              | 0.96                                                            | 0.83, 1.11 | 19,658             | 9,829                | 100                  | 9,829                 | 24.00                 | 722      | 34.40    | 354                 | 368                  |
| 0.05                           | 0.96                                                            | 0.83, 1.11 | 19,658             | 9,829                | 100                  | 9,829                 | 24.00                 | 722      | 34.40    | 354                 | 368                  |
| 0.025                          | 0.96                                                            | 0.83, 1.11 | 19,658             | 9,829                | 100                  | 9,829                 | 24.00                 | 722      | 34.40    | 354                 | 368                  |
| 0.01                           | 0.96                                                            | 0.83, 1.11 | 19,658             | 9,829                | 100                  | 9,829                 | 24.00                 | 722      | 34.40    | 354                 | 368                  |
| 0.001                          | 0.96                                                            | 0.83, 1.11 | 19,658             | 9,829                | 100                  | 9,829                 | 24.00                 | 722      | 34.40    | 354                 | 368                  |
| 0.0001                         | 0.96                                                            | 0.83, 1.12 | 19,630             | 9,815                | 99.86                | 9,815                 | 23.96                 | 717      | 34.16    | 352                 | 365                  |

CI, confidence interval; DRS, disease risk score; OR, odds ratio; PPS, prognostic propensity score; PS, propensity score; SD, standard deviation.

<sup>a</sup> Unadjusted odds ratio: 0.84 (95% CI: 0.75, 0.94).

<sup>b</sup> SD logit(DRS) = 0.8507; SD logit(PPS) = 0.2096; SD logit(PS) = 0.7049.

**Summary score distributions for cyclooxygenase 2 inhibitors and gastrointestinal toxicity example:**

**Web Figure 4. Propensity score distributions**

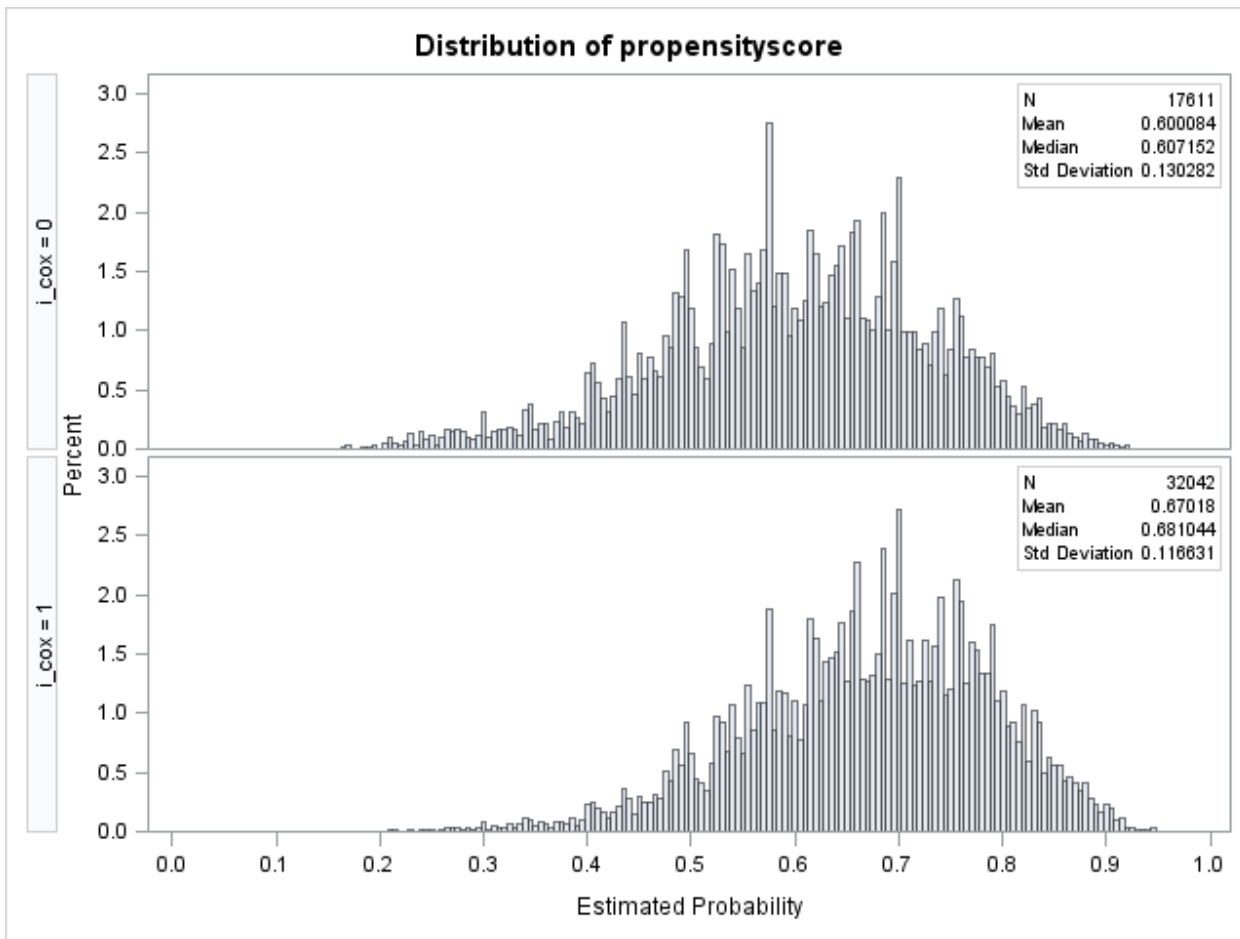



Web Figure 5. Disease risk score distributions

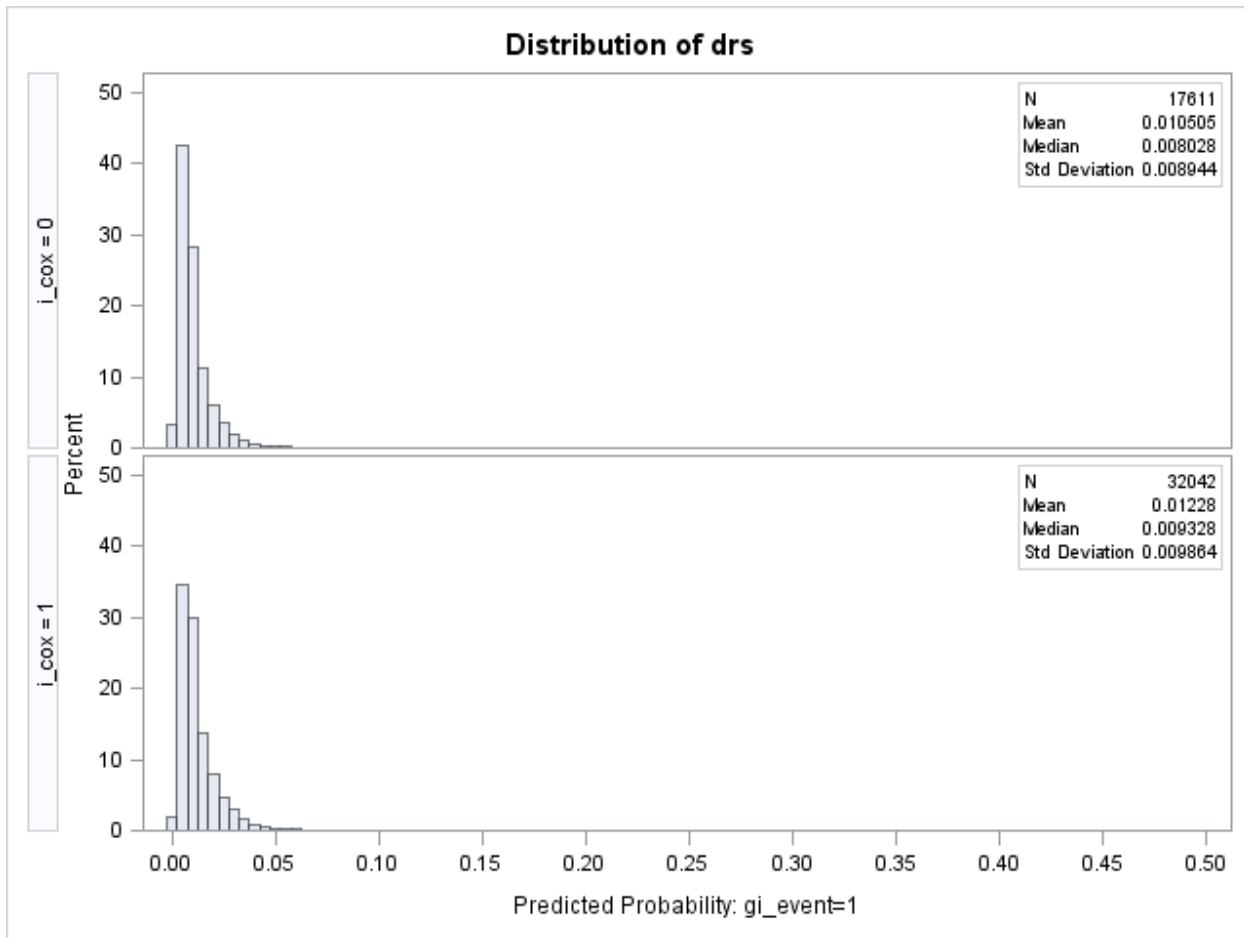

Web Figure 6. Prognostic propensity score distributions

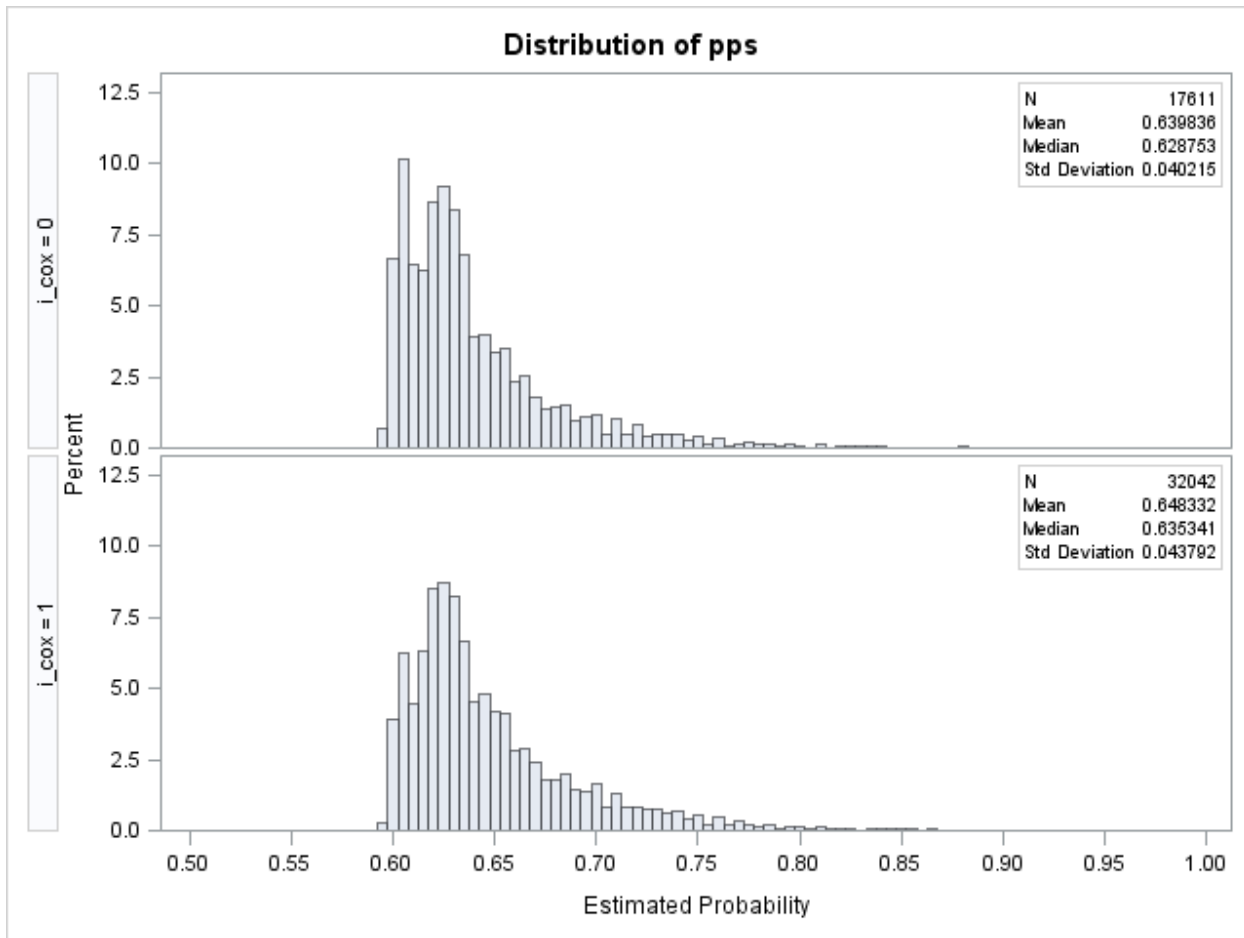

**Web Table 2. 1:1 Matching Results in Coxibs vs. Nonselective Nonsteroidal Anti-inflammatory Drugs and GI Toxicity Example**

| Caliper Width                  | Odds Ratio for GI Toxicity for Coxibs vs. ns-NSAIDs <sup>a</sup> |            | # Patients Matched | # Coxib Matched | % Coxib Matched | # ns-NSAID Matched | % ns-NSAID Matched | # Events | % Events | # Events Coxib | # Events ns-NSAID |
|--------------------------------|------------------------------------------------------------------|------------|--------------------|-----------------|-----------------|--------------------|--------------------|----------|----------|----------------|-------------------|
|                                | OR                                                               | 95% CI     |                    |                 |                 |                    |                    |          |          |                |                   |
| <b>PS</b>                      |                                                                  |            |                    |                 |                 |                    |                    |          |          |                |                   |
| 0.3*SD logit(PS) <sup>b</sup>  | 0.87                                                             | 0.70, 1.08 | 32,886             | 16,443          | 51.32           | 16,443             | 93.37              | 335      | 60.69    | 156            | 179               |
| 0.2*SD logit(PS)               | 0.87                                                             | 0.70, 1.07 | 32,854             | 16,427          | 51.27           | 16,427             | 93.28              | 334      | 60.51    | 155            | 179               |
| 0.1*SD logit(PS)               | 0.87                                                             | 0.70, 1.08 | 32,786             | 16,393          | 51.16           | 16,393             | 93.08              | 333      | 60.33    | 155            | 178               |
| 0.05                           | 0.88                                                             | 0.71, 1.09 | 32,842             | 16,421          | 51.25           | 16,421             | 93.24              | 333      | 60.33    | 155            | 178               |
| 0.025                          | 0.88                                                             | 0.71, 1.09 | 32,756             | 16,378          | 51.11           | 16,378             | 93.00              | 331      | 59.96    | 155            | 176               |
| 0.01                           | 0.88                                                             | 0.71, 1.09 | 32,744             | 16,372          | 51.10           | 16,372             | 92.96              | 331      | 59.96    | 155            | 176               |
| 0.001                          | 0.88                                                             | 0.71, 1.09 | 32,512             | 16,256          | 50.73           | 16,256             | 92.31              | 331      | 59.96    | 155            | 176               |
| 0.0001                         | 0.90                                                             | 0.72, 1.12 | 30,966             | 15,483          | 48.32           | 15,483             | 87.92              | 311      | 56.34    | 147            | 164               |
| <b>DRS</b>                     |                                                                  |            |                    |                 |                 |                    |                    |          |          |                |                   |
| 0.3*SD logit(DRS) <sup>b</sup> | 0.96                                                             | 0.78, 1.19 | 33,630             | 16,815          | 52.48           | 16,815             | 95.48              | 349      | 63.22    | 171            | 178               |
| 0.2*SD logit(DRS)              | 0.96                                                             | 0.78, 1.19 | 33,630             | 16,815          | 52.48           | 16,815             | 95.48              | 349      | 63.22    | 171            | 178               |
| 0.1*SD logit(DRS)              | 0.96                                                             | 0.78, 1.19 | 33,626             | 16,813          | 52.47           | 16,813             | 95.47              | 349      | 63.22    | 171            | 178               |
| 0.05                           | 0.97                                                             | 0.79, 1.19 | 35,220             | 17,610          | 54.96           | 17,610             | 99.99              | 364      | 65.94    | 179            | 185               |
| 0.025                          | 0.97                                                             | 0.79, 1.19 | 35,220             | 17,610          | 54.96           | 17,610             | 99.99              | 364      | 65.94    | 179            | 185               |
| 0.01                           | 0.97                                                             | 0.79, 1.19 | 35,220             | 17,610          | 54.96           | 17,610             | 99.99              | 364      | 65.94    | 179            | 185               |
| 0.001                          | 0.97                                                             | 0.79, 1.19 | 35,206             | 17,603          | 54.94           | 17,603             | 99.95              | 364      | 65.94    | 179            | 185               |
| 0.0001                         | 0.98                                                             | 0.80, 1.21 | 34,992             | 17,496          | 54.60           | 17,496             | 99.35              | 359      | 65.04    | 178            | 181               |
| <b>PPS</b>                     |                                                                  |            |                    |                 |                 |                    |                    |          |          |                |                   |
| 0.3*SD logit(PPS) <sup>b</sup> | 0.97                                                             | 0.79, 1.19 | 35,058             | 17,529          | 54.71           | 17,529             | 99.53              | 360      | 65.22    | 177            | 183               |
| 0.2*SD logit(PPS)              | 0.97                                                             | 0.79, 1.19 | 35,056             | 17,528          | 54.70           | 17,528             | 99.53              | 360      | 65.22    | 177            | 183               |
| 0.1*SD logit(PPS)              | 0.97                                                             | 0.79, 1.19 | 35,036             | 17,518          | 54.67           | 17,518             | 99.47              | 360      | 65.22    | 177            | 183               |
| 0.05                           | 0.97                                                             | 0.79, 1.19 | 35,024             | 17,512          | 54.65           | 17,512             | 99.44              | 360      | 65.22    | 177            | 183               |
| 0.025                          | 0.97                                                             | 0.79, 1.19 | 35,024             | 17,512          | 54.65           | 17,512             | 99.44              | 360      | 65.22    | 177            | 183               |
| 0.01                           | 0.97                                                             | 0.79, 1.19 | 35,024             | 17,512          | 54.65           | 17,512             | 99.44              | 360      | 65.22    | 177            | 183               |
| 0.001                          | 0.98                                                             | 0.80, 1.20 | 34,940             | 17,470          | 54.52           | 17,470             | 99.20              | 358      | 64.86    | 177            | 181               |
| 0.0001                         | 0.99                                                             | 0.81, 1.23 | 34,176             | 17,088          | 53.33           | 17,088             | 97.03              | 345      | 62.50    | 172            | 173               |

CI, confidence interval; Coxib, cyclooxygenase 2 inhibitor; DRS, disease risk score; GI, gastrointestinal; OR, odds ratio; PPS, prognostic propensity score; PS, propensity score; SD, standard deviation.

<sup>a</sup> Unadjusted odds ratio: 1.09 (95% CI: 0.91, 1.30).

<sup>b</sup> SD logit(DRS) = 0.7053; SD logit(PPS) = 0.2090; SD logit(PS) = 0.5896.

Summary score distributions for simvastatin + ezetimibe and composite cardiovascular outcome example

Web Figure 7. Propensity score distributions

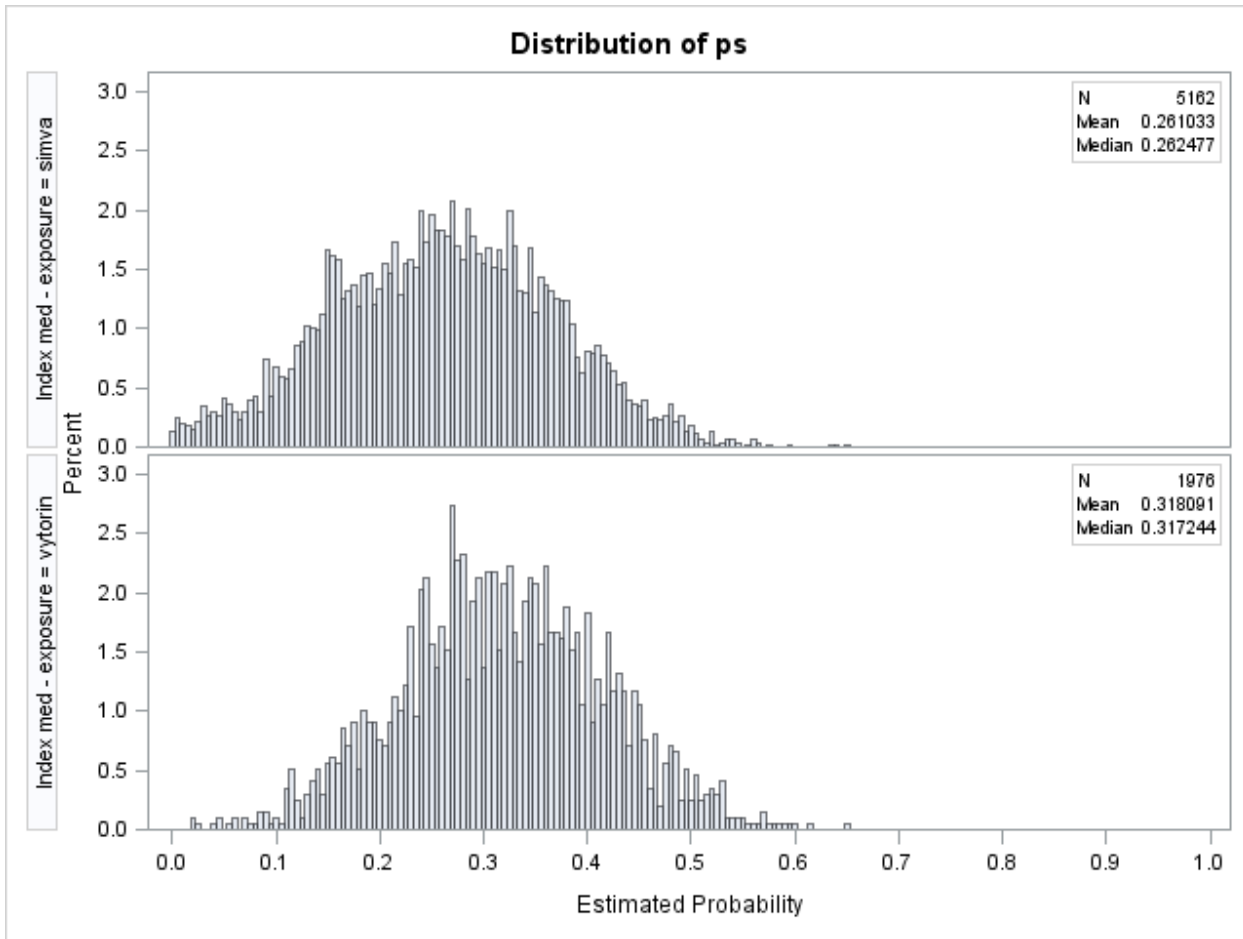

Web Figure 8. Disease risk score distributions

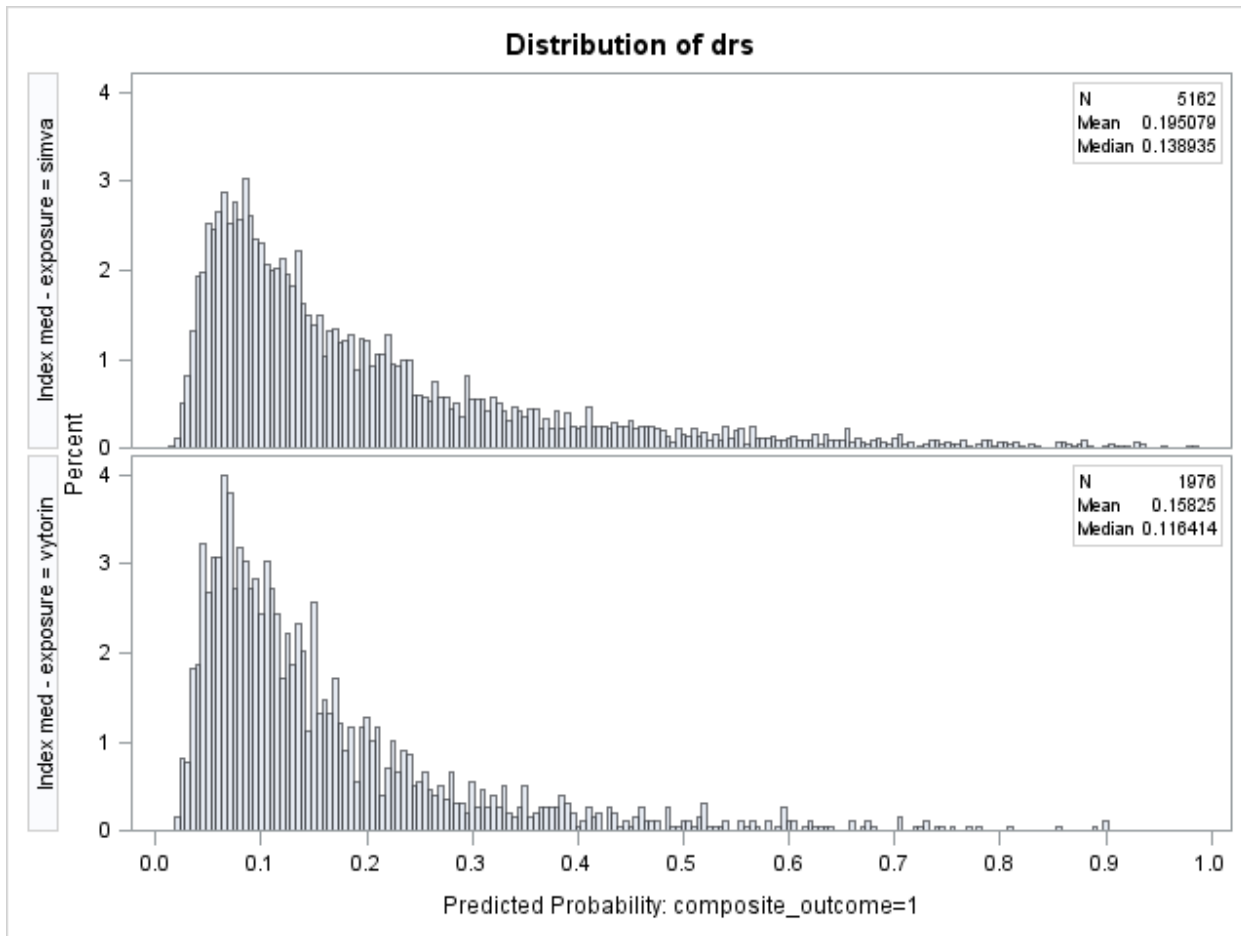

Web Figure 9. Prognostic propensity score distributions

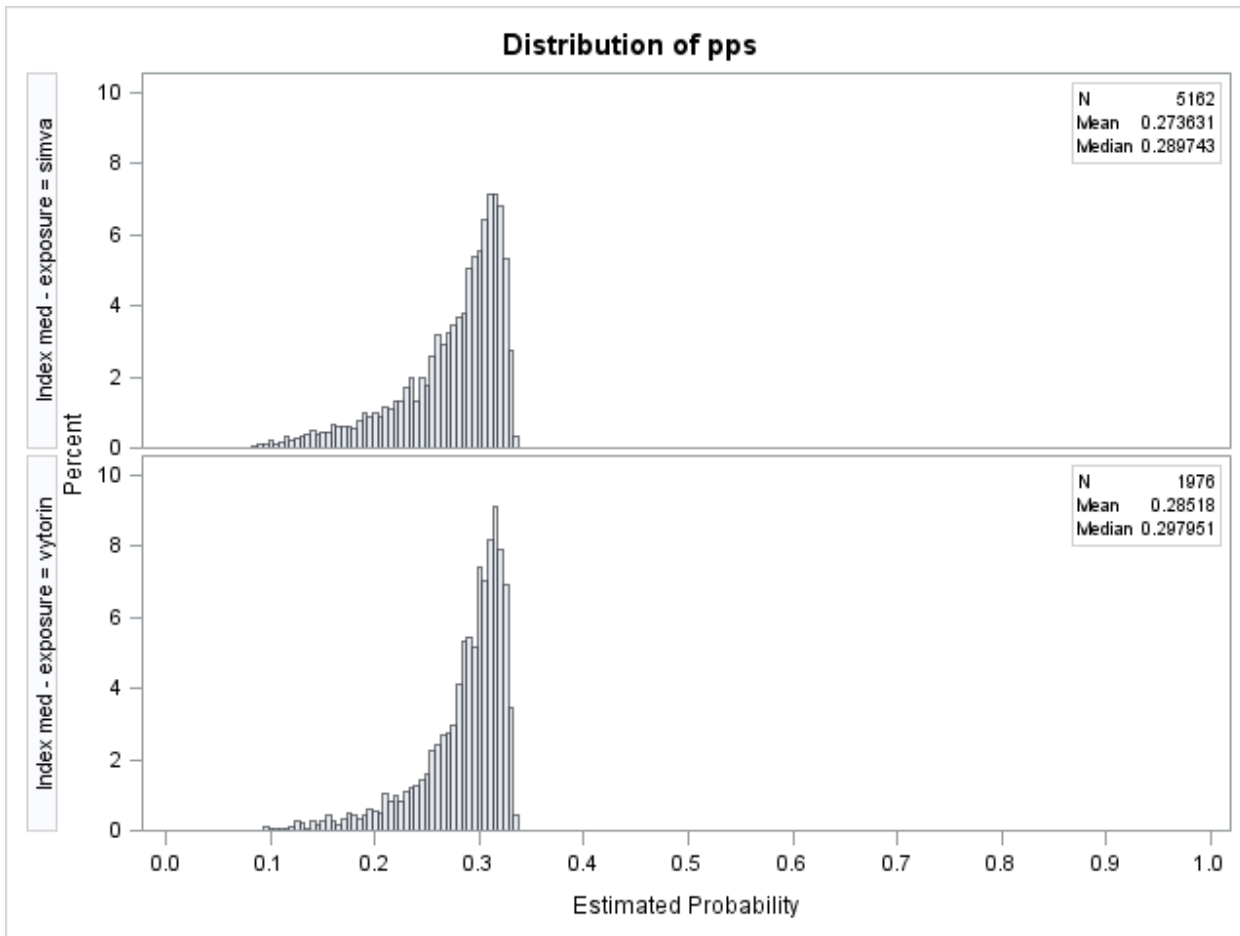

**Web Table 3. 1:1 Matching Results in Simvastatin + Ezetimibe vs. Simvastatin and Composite Cardiovascular Outcome Example**

| Caliper Width                     | Odds Ratio For Composite Simvastatin + Ezetimibe vs. Simvastatin <sup>a</sup> |            | # Patients Matched | # Simvastatin + Ezetimibe Matched | % Simvastatin + Ezetimibe Matched | # Simvastatin Matched | % Simvastatin Matched | # Events | % Events | # Events Simvastatin + Ezetimibe | # Events Simvastatin |
|-----------------------------------|-------------------------------------------------------------------------------|------------|--------------------|-----------------------------------|-----------------------------------|-----------------------|-----------------------|----------|----------|----------------------------------|----------------------|
|                                   | OR                                                                            | 95% CI     |                    |                                   |                                   |                       |                       |          |          |                                  |                      |
| <b>DRS</b>                        |                                                                               |            |                    |                                   |                                   |                       |                       |          |          |                                  |                      |
| 0.3*SD<br>logit(DRS) <sup>b</sup> | 0.76                                                                          | 0.65, 0.90 | 3,952              | 1,976                             | 100.00                            | 1,976                 | 38.28                 | 566      | 45.21    | 245                              | 321                  |
| 0.2*SD<br>logit(DRS)              | 0.76                                                                          | 0.65, 0.90 | 3,952              | 1,976                             | 100.00                            | 1,976                 | 38.28                 | 566      | 45.21    | 245                              | 321                  |
| 0.1*SD<br>logit(DRS)              | 0.76                                                                          | 0.65, 0.90 | 3,952              | 1,976                             | 100.00                            | 1,976                 | 38.28                 | 566      | 45.21    | 245                              | 321                  |
| 0.05                              | 0.76                                                                          | 0.65, 0.90 | 3,952              | 1,976                             | 100.00                            | 1,976                 | 38.28                 | 566      | 45.21    | 245                              | 321                  |
| 0.025                             | 0.76                                                                          | 0.65, 0.90 | 3,952              | 1,976                             | 100.00                            | 1,976                 | 38.28                 | 566      | 45.21    | 245                              | 321                  |
| 0.01                              | 0.76                                                                          | 0.65, 0.90 | 3,952              | 1,976                             | 100.00                            | 1,976                 | 38.28                 | 566      | 45.21    | 245                              | 321                  |
| 0.001                             | 0.77                                                                          | 0.65, 0.91 | 3,908              | 1,954                             | 98.89                             | 1,954                 | 37.85                 | 544      | 43.45    | 236                              | 308                  |
| 0.0001                            | 0.84                                                                          | 0.71, 1.06 | 3,206              | 1,603                             | 81.12                             | 1,603                 | 31.05                 | 384      | 30.67    | 178                              | 206                  |
| <b>PPS</b>                        |                                                                               |            |                    |                                   |                                   |                       |                       |          |          |                                  |                      |
| 0.3*SD<br>logit(PPS) <sup>b</sup> | 0.76                                                                          | 0.65, 0.90 | 3,952              | 1,976                             | 100.00                            | 1,976                 | 38.28                 | 566      | 45.21    | 245                              | 321                  |
| 0.2*SD<br>logit(PPS)              | 0.76                                                                          | 0.65, 0.90 | 3,952              | 1,976                             | 100.00                            | 1,976                 | 38.28                 | 566      | 45.21    | 245                              | 321                  |
| 0.1*SD<br>logit(PPS)              | 0.76                                                                          | 0.65, 0.90 | 3,952              | 1,976                             | 100.00                            | 1,976                 | 38.28                 | 566      | 45.21    | 245                              | 321                  |

|                                  |      |            |       |       |        |       |       |     |       |     |     |
|----------------------------------|------|------------|-------|-------|--------|-------|-------|-----|-------|-----|-----|
| 0.05                             | 0.76 | 0.65, 0.90 | 3,952 | 1,976 | 100.00 | 1,976 | 38.28 | 566 | 45.21 | 245 | 321 |
| 0.025                            | 0.76 | 0.65, 0.90 | 3,952 | 1,976 | 100.00 | 1,976 | 38.28 | 566 | 45.21 | 245 | 321 |
| 0.01                             | 0.76 | 0.65, 0.90 | 3,952 | 1,976 | 100.00 | 1,976 | 38.28 | 566 | 45.21 | 245 | 321 |
| 0.001                            | 0.76 | 0.65, 0.90 | 3,952 | 1,976 | 100.00 | 1,976 | 38.28 | 566 | 45.21 | 245 | 321 |
| 0.0001                           | 0.79 | 0.66, 0.94 | 3,740 | 1,870 | 94.64  | 1,870 | 36.23 | 497 | 39.70 | 219 | 278 |
| <b>PS</b>                        |      |            |       |       |        |       |       |     |       |     |     |
| 0.3*SD<br>logit(PS) <sup>b</sup> | 0.78 | 0.66, 0.92 | 3,934 | 1,967 | 99.54  | 1,967 | 38.11 | 558 | 44.57 | 244 | 314 |
| 0.2*SD<br>logit(PS)              | 0.78 | 0.66, 0.92 | 3,922 | 1,961 | 99.24  | 1,961 | 37.99 | 555 | 44.33 | 243 | 312 |
| 0.1*SD<br>logit(PS)              | 0.78 | 0.66, 0.92 | 3,912 | 1,956 | 98.99  | 1,956 | 37.89 | 555 | 44.33 | 243 | 312 |
| 0.05                             | 0.78 | 0.66, 0.92 | 3,934 | 1,967 | 99.54  | 1,967 | 38.11 | 558 | 44.57 | 244 | 314 |
| 0.025                            | 0.78 | 0.66, 0.92 | 3,918 | 1,959 | 99.14  | 1,959 | 37.95 | 555 | 44.33 | 243 | 312 |
| 0.01                             | 0.78 | 0.66, 0.92 | 3,908 | 1,954 | 98.89  | 1,954 | 37.85 | 554 | 44.25 | 243 | 311 |
| 0.001                            | 0.78 | 0.66, 0.93 | 3,802 | 1,901 | 96.20  | 1,901 | 36.83 | 547 | 43.69 | 240 | 307 |
| 0.0001                           | 0.83 | 0.69, 1.00 | 2,988 | 1,494 | 75.61  | 1,494 | 28.94 | 435 | 34.74 | 197 | 238 |

CI, confidence interval; DRS, disease risk score; OR, odds ratio; PPS, prognostic propensity score; PS, propensity score; SD, standard deviation.

<sup>a</sup> Unadjusted odds ratio: 0.58 (95% CI: 0.50, 0.68).

<sup>b</sup> SD logit(DRS) = 0.9901; SD logit(PPS) = 0.2724; SD logit(PS) = 0.6917.

## Web Reference

1. Ray WA, Griffin MR, Fought RL, Adams ML. Identification of fractures from computerized Medicare files. *J Clin Epidemiol.* 1992;45(7):703–714.
